# Supplementary material
Source: ML conference proceedings conference paper supplement (https://openaccess.thecvf.com/content/ICCV2025/html/Wang_VQ-VLA_Improving_Vision-Language-Action_ICCV_2025_paper.html)
Supplement: Supplementary file 1 [file Wang_VQ-VLA_Improving_Vision-Language-Action_ICCV_2025_supplemental.pdf]

## A. Model Architecture Details

The Residual VQ-VAE model is a residual vector-quantized variational autoencoder designed for action sequence modeling. The architecture consists of an encoder, a residual vector quantization module, and a decoder, all implemented with causal convolutional layers to preserve temporal dependencies.

### A.1. Encoder

The encoder takes as input action sequences with one channel and encodes them into a latent representation of dimension 128. It is composed of four blocks. Each block contains four residual layers, with output channels set to [128, 256, 256, 512]. The encoder uses the SiLU activation function and group normalization with 32 groups. The encoder output is further processed by a group normalization layer, a SiLU activation, and a final convolutional layer to produce the latent features.

### A.2. Residual Vector Quantization

The latent features from the encoder are quantized using a Residual Vector Quantization (RVQ) module. The RVQ module uses 4 codebook groups, each with 256 entries, and an embedding dimension of 128. K-means initialization is used for the codebooks to stabilize training. The quantized latent vectors are then passed to the decoder.

### A.3. Decoder

The decoder reconstructs the action sequence from the quantized latent representation. It consists of four blocks, with four layers per block and output channels [128, 256, 256, 512]. The decoder mirrors the encoder in terms of activation (SiLU) and normalization (group norm, 32 groups). The final output is projected to the original action dimension using a linear layer, followed by normalization, activation, and a final convolution. The output is sliced to match the original action window size.

## B. Real-World Experiments Hardware Platform

In this section, we detail the specifics of our real-world hardware platform, as shown in Fig. 4. Our setup primarily comprises a single Franka Research3 robotic arm paired with a third-person-view RealSense D435 camera. This camera is securely mounted in a fixed position, enabling it to capture comprehensive environmental observations with a resolution of 640x480 pixels. The entire system operates at a consistent frequency of 20 Hz. Actions for the robotic arm are precisely defined as absolute end-effector poses within the SE(3) space, which includes both the 3D position and the quaternion orientation. For data collection, we leveraged

existing code from the Deoxys Control repository<sup>1</sup>, utilizing a 3D mouse for teleoperation.

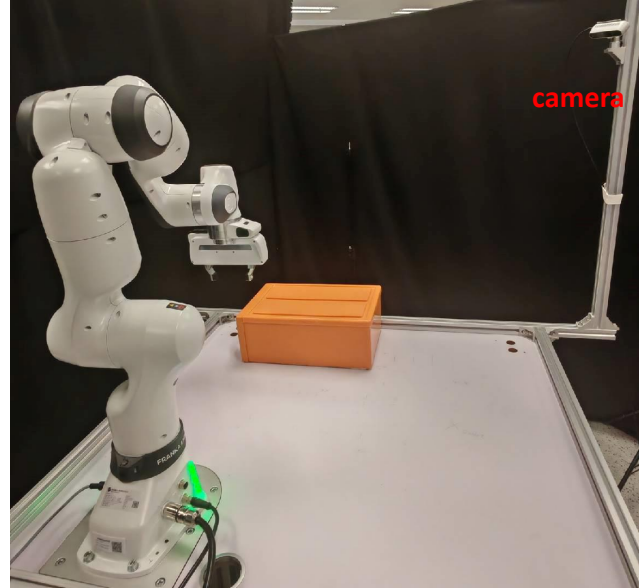

Figure 4. The Real-world Franka Robot Arm Experiments Hardware Platform.

## C. The Evaluation Experiment Results.

### C.1. The Success Rate Results of All Tasks.

We present the experimental results for three distinct models: VQ<sub>O</sub>, VQ<sub>O+L</sub>, and VQ<sub>O+L+M</sub>. These models were evaluated on both the Libero-90 and a series of real-world experiments. The comprehensive results are summarized in Tab. 7.

### C.2. Comparison with Other Tokenizers

We compared our VQ<sub>O+L+M</sub> action tokenizer with Fast[35] and Quest[32] on two real-world tasks: "pick the snake" and "put the snake into the drawer." All experiments utilized the OpenVLA backbone, and all tokenizers were deployed in a zero-shot manner without any fine-tuning (only the VLA backbone was fine-tuned). Results are in Tab. 8.

### C.3. LIBERO-Long results

While LIBERO-90 already incorporates long-horizon tasks within its benchmark, we further evaluated our best tokenizer on LIBERO-Long. Our results demonstrated an improvement: VQ-VLA achieved a success rate of 55%, which represents a 4% increase over OpenVLA's 51% success rate on the same benchmark. This performance uplift underscores VQ-VLA's enhanced ability to manage and execute complex, multi-step tasks.

<sup>1</sup>[https://github.com/UT-Austin-RPL/deoxys\\_control](https://github.com/UT-Austin-RPL/deoxys_control)

|                              | baseline(%) | VQ_O(%) | VQ_O+L(%) | VQ_O+L+M(%) |
|------------------------------|-------------|---------|-----------|-------------|
| LIBERO-90                    | 73.53       | 71.93   | 86.16     | -           |
| Pick up the [TOY NAME]       | 37          | 33      | 40        | 55          |
| Put the toy into the basket  | 20          | 35      | 35        | 45          |
| Flip the pot upright         | 30          | 45      | 45        | 60          |
| Pull out a tissue paper      | 5           | 25      | 20        | 25          |
| <b>Short-horizon average</b> | 23          | 34.5    | 35        | 46.25       |
| Put all cups in the basket   | 15          | 15      | 40        | 50          |
| Put the toy into the drawer  | 5           | 15      | 15        | 30          |
| <b>Long-horizon average</b>  | 10          | 15      | 25        | 40          |

Table 7. **The success rates for all tasks**

| Tokenizer                  | pick the snake | put the snake into the drawer |
|----------------------------|----------------|-------------------------------|
| FAST                       | 20             | 5                             |
| QueST                      | 10             | 0                             |
| VQ <sub>O+L+M</sub> (Ours) | <b>65</b>      | <b>20</b>                     |

Table 8. **Success rate with different tokenizers.**

#### C.4. Decoder Capacity.

For fair comparison, all VLA backbones in our experiments were finetuned using the same data. Our VQ head adds negligible parameters (0.9% of total), indicating improvements stem from our modeling approach. Comparison with a scratch end-to-end action head on OpenVLA will be added in the camera-ready version. Additionally, we compared the VQ head with a scratch end-to-end action head on OpenVLA, as well as with UniAct[58]. For the scratch end-to-end action head, the final layer features from the VLA output were directly fed into a Multi-Layer Perceptron (MLP) to produce the action. Results are in Tab.9

|                         | LIBERO-90(%) |
|-------------------------|--------------|
| UniAct                  | 61.69        |
| scratch end-to-end head | 2.91         |
| VQ head (Ours)          | <b>86.16</b> |

Table 9. **Success rate with different decoder capacities.**
